# Supplementary material for: A Mutation in the Srrm4 Gene Causes Alternative Splicing Defects and Deafness in the Bronx Waltzer Mouse
Source: PubMed Central journal article supplement (PMC3464207; doi:10.1371/journal.pgen.1002966), 2012-10-04

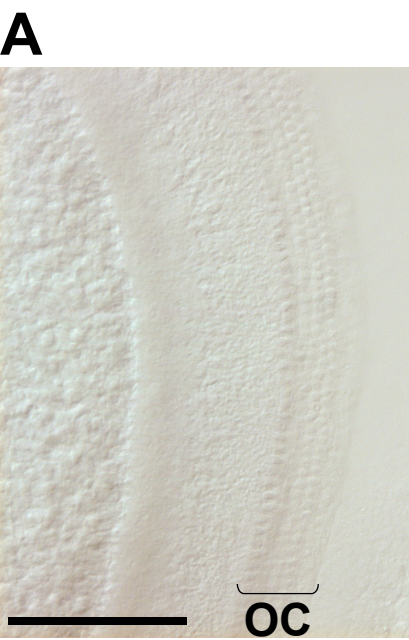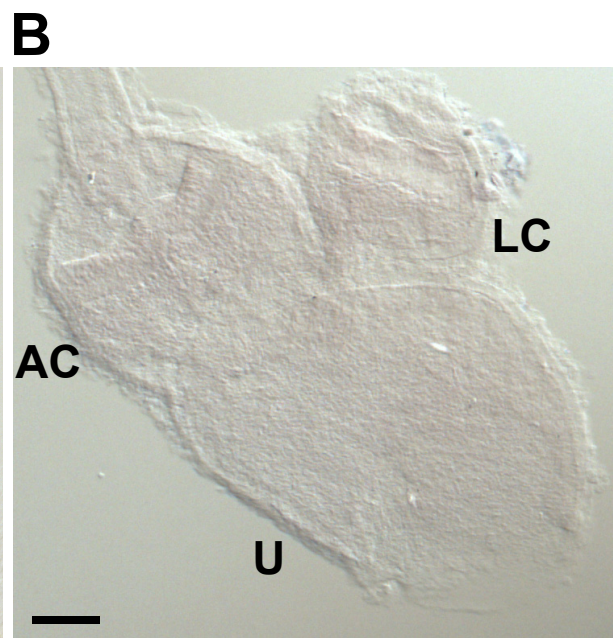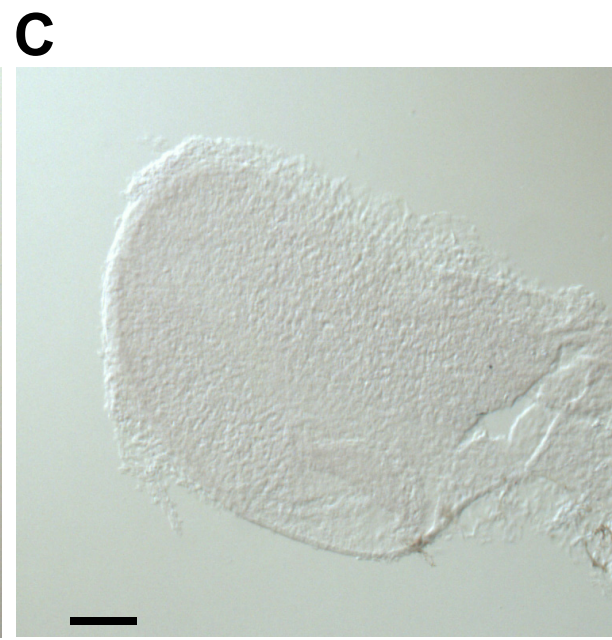

Supplement: pgen.1002966.s001.pdf [file pgen.1002966.s001.pdf]
