# Supplementary material for: A Mutation in the Srrm4 Gene Causes Alternative Splicing Defects and Deafness in the Bronx Waltzer Mouse
Source: PubMed Central journal article supplement (PMC3464207; doi:10.1371/journal.pgen.1002966), 2012-10-04

A

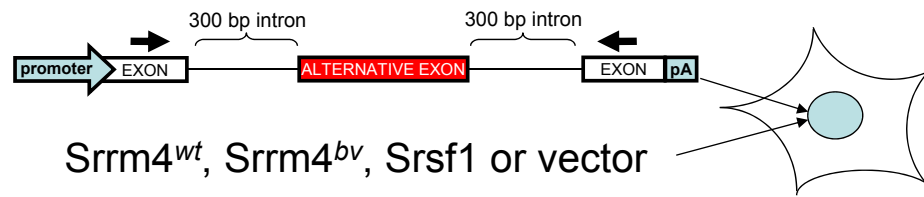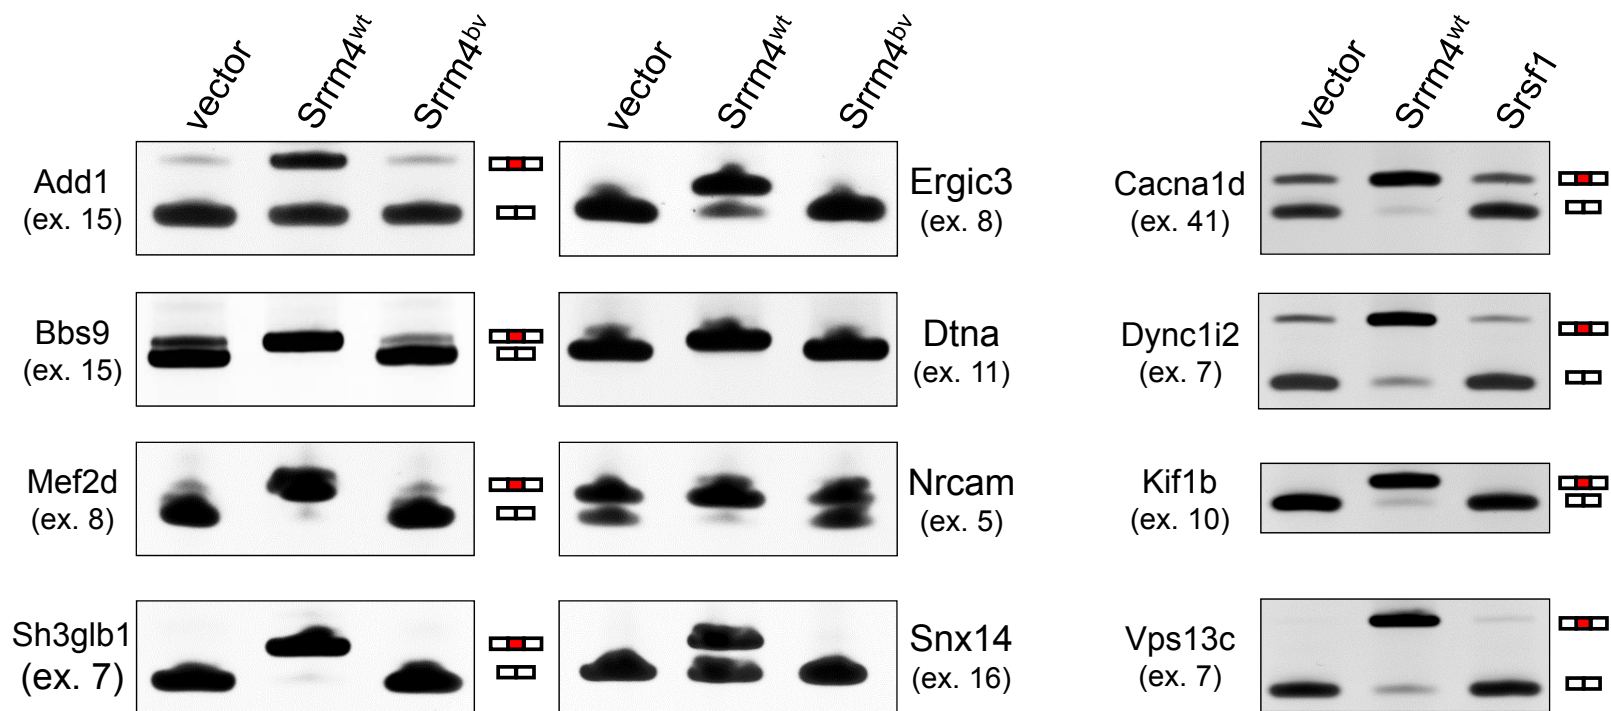

B

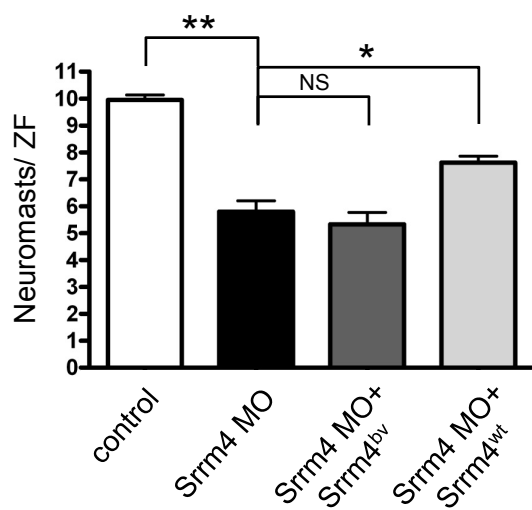

C

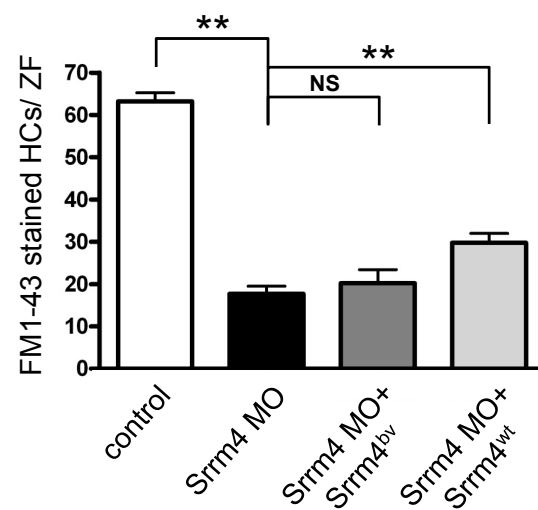

Supplement: pgen.1002966.s010.pdf [file pgen.1002966.s010.pdf]
