# Supplementary material for: A Mutation in the Srrm4 Gene Causes Alternative Splicing Defects and Deafness in the Bronx Waltzer Mouse
Source: PLOS journal article supplement (doi:10.1371/journal.pgen.1002966), 2012-10-04

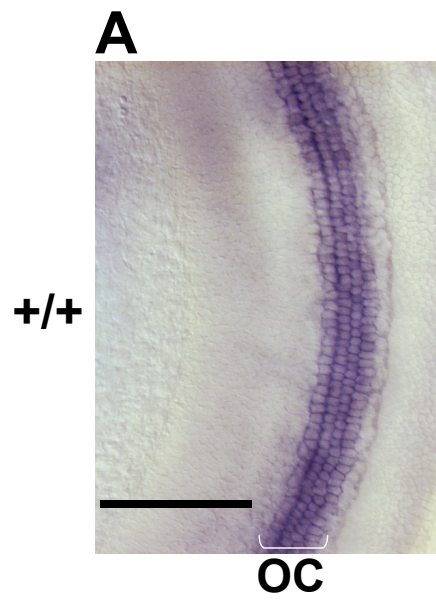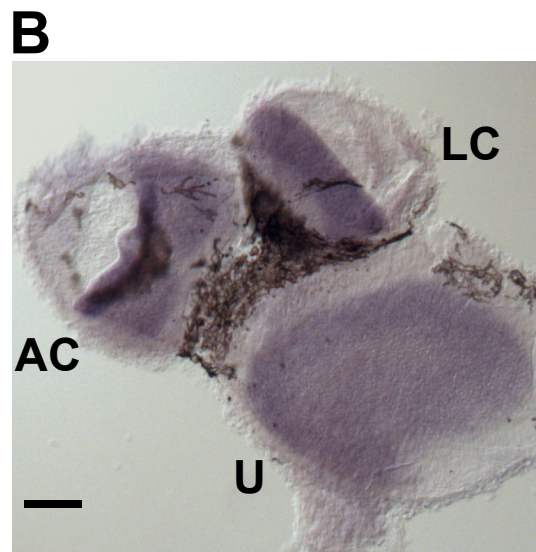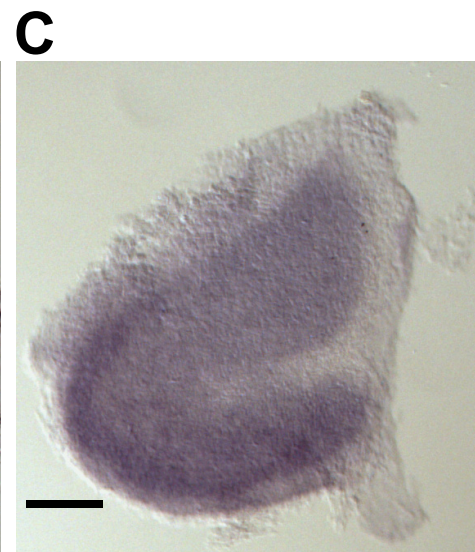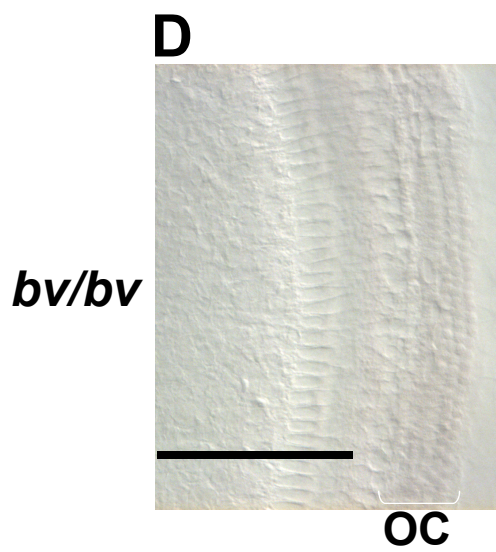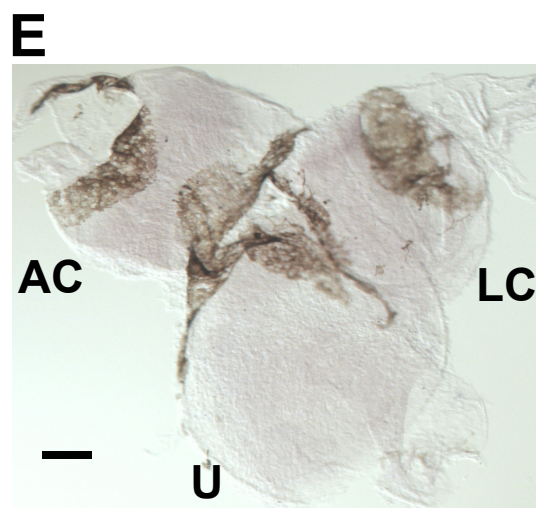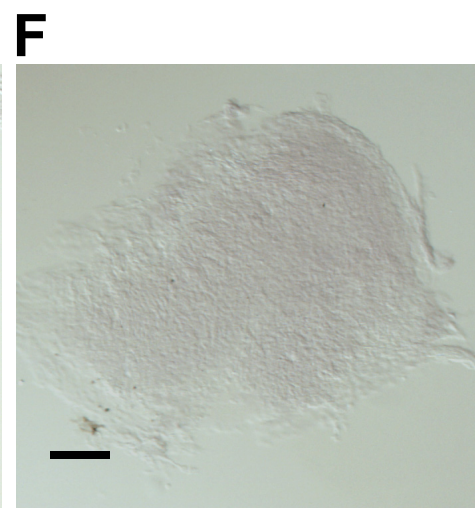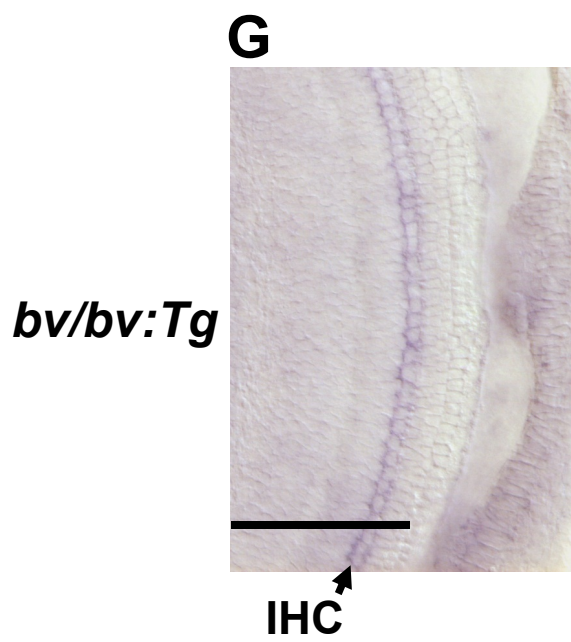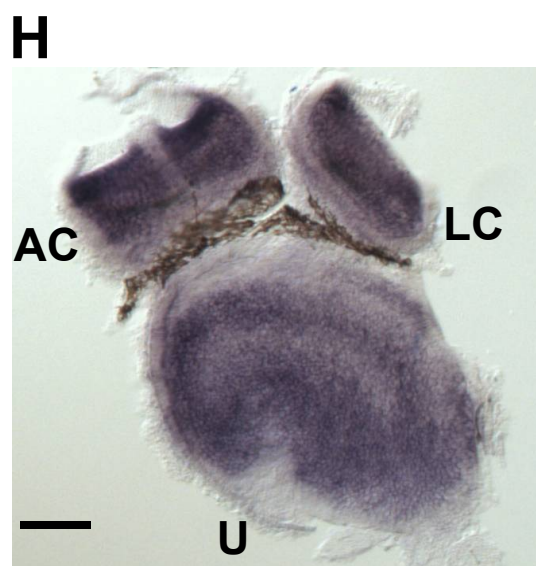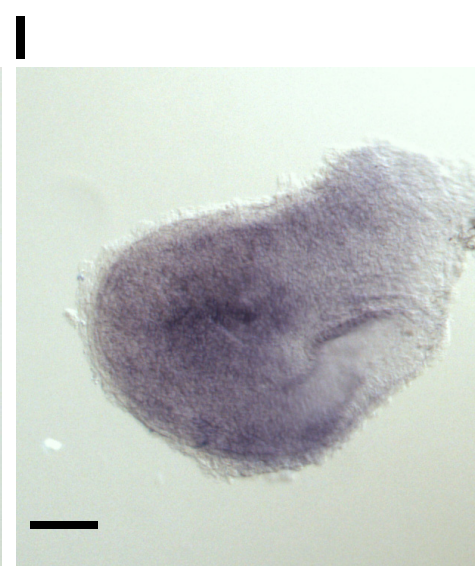

Supplement: S2 (10.1371/journal.pgen.1002966.s002) [file journal.pgen.1002966.s002]
