# Supplementary material for: A Mutation in the Srrm4 Gene Causes Alternative Splicing Defects and Deafness in the Bronx Waltzer Mouse
Source: PLoS Genet. 2012 Oct 4;8(10):e1002966. doi: 10.1371/journal.pgen.1002966 (PMC3464207; doi:10.1371/journal.pgen.1002966)
Supplement: Table S3 — Publications describing the subcellular localization and interactions of proteins encoded by Srrm4-regulated mRNAs. (XLS) [file pgen.1002966.s014.xls]

## Sheet: Table S3
Protein name	Publications on subcellular localization and protein-protein interactions
Add1	Zhang, M., Kalinec, G.M., Urrutia, R., Billadeau, D.D. and Kalinec, F. (2003). ROCK-dependent and ROCK-independent control of cochlear outer hair cell electromotility. J. Biol. Chem. 278, 35644-35650.
	Li, X. and Bennett, V. (1996). Identification of the spectrin subunit and domains required for formation of spectrin/adducin/actin complexes. J. Biol. Chem. 271, 15695-15702.
Ap1s2	Robinson, M.S. (2004). Adaptable adaptors for coated vesicles. Trends Cell Biol. 14, 167-174.
Atl2	Rismanchi, N., Soderblom, C., Stadler, J., Zhu, P.P. and Blackstone, C. (2008). Atlastin GTPases are required for Golgi apparatus and ER morphogenesis. Hum. Mol. Genet. 17, 1591-1604.
C230096C10Rik (a homolog of the yeast protein Emc1p)	Jonikas, M.C., Collins, S.R., Denic, V., Oh, E., Quan, E.M., Schmid, V., Weibezahn, J., Schwappach, B., Walter, P., Weissman, J.S. et al. (2009). Comprehensive characterization of genes required for protein folding in the endoplasmic reticulum. Science 323, 1693-1697.
Cacna1b	Maximov, A., Südhof, T.C. and Bezprozvanny, I. (1999). Association of neuronal calcium channels with modular adaptor proteins. J. Biol. Chem. 274, 24453-24456.
	Waithe, D., Ferron, L., Page, K.M., Chaggar, K. and Dolphin, A.C. (2011). Beta-subunits promote the expression of Ca(V)2.2 channels by reducing their proteasomal degradation. J. Biol. Chem. 286, 9598-9611.
Cacna1d	Neef, J., Gehrt, A., Bulankina, A.V., Meyer, A.C., Riedel, D., Gregg, R.G., Strenzke, N. and Moser, T. (2009). The Ca2+ channel subunit beta2 regulates Ca2+ channel abundance and function in inner hair cells and is required for hearing. J. Neurosci. 29, 10730-10740.
	Kaeser, P.S., Deng, L. , Wang, Y., Dulubova, I., Liu, X., Rizo, J. and Südhof, T.C. (2011). RIM proteins tether Ca2+ channels to presynaptic active zones via a direct PDZ-domain interaction. Cell 144, 282-295.
Cacnb1	Buraei, Z. and Yang, J. (2010). The ß subunit of voltage-gated Ca2+ channels. Physiol. Rev. 90, 1461-1506.
	Waithe, D., Ferron, L., Page, K.M., Chaggar, K. and Dolphin, A.C. (2011). Beta-subunits promote the expression of Ca(V)2.2 channels by reducing their proteasomal degradation. J. Biol. Chem. 286, 9598-9611.
Cacnb2	Neef, J., Gehrt, A., Bulankina, A.V., Meyer, A.C., Riedel, D., Gregg, R.G., Strenzke, N. and Moser, T. (2009). The Ca2+ channel subunit beta2 regulates Ca2+ channel abundance and function in inner hair cells and is required for hearing. J. Neurosci. 29, 10730-10740.
	Kiyonaka, S., Wakamori, M., Miki, T., Uriu, Y., Nonaka, M., Bito, H., Beedle, A.M., Mori, E., Hara, Y., De Waard, M. et al. (2007). RIM1 confers sustained activity and neurotransmitter vesicle anchoring to presynaptic Ca2+ channels. Nat. Neurosci. 10, 691-701.
Cadps (a.k.a. Caps)	Daily, N.J., Boswell, K.L., James, D.J. and Martin, T.F. (2010). Novel interactions of CAPS (Ca2+-dependent activator protein for secretion) with the three neuronal SNARE proteins required for vesicle fusion. J. Biol. Chem. 285, 35320-35329.
	Sadakata, T., Shinoda, Y., Sekine, Y., Saruta, C., Itakura, M., Takahashi, M. and Furuichi, T. (2010). Interaction of calcium-dependent activator protein for secretion 1 (CAPS1) with the class II ADP-ribosylation factor small GTPases is required for dense-core vesicle trafficking in the trans-Golgi network. J. Biol. Chem. 285, 38710-38719.
	Jockusch, W.J., Speidel, D., Sigler, A., Sørensen, J.B., Varoqueaux, F., Rhee, J.S. and Brose, N. (2007). CAPS-1 and CAPS-2 are essential synaptic vesicle priming proteins. Cell 131, 796-808.
Cask	Jin, Y. and Garner, C.C. (2008). Molecular mechanisms of presynaptic differentiation. Annu. Rev. Cell Dev. Biol. 24, 237-262.
	Olsen, O., Moore, K.A., Nicoll, R.A. and Bredt, D.S. (2006). Synaptic transmission regulated by a presynaptic MALS/Liprin-alpha protein complex. Curr. Opin. Cell Biol. 18, 223-227.
	Hata, Y., Butz, S. and Südhof, T.C. (1996). CASK: a novel dlg/PSD95 homolog with an N-terminal calmodulin-dependent protein kinase domain identified by interaction with neurexins. J. Neurosci. 16, 2488-2494.
	Butz, S., Okamoto, M. and Südhof, T.C. (1998). A tripartite protein complex with the potential to couple synaptic vesicle exocytosis to cell adhesion in brain. Cell 94, 773-782.
Dopey1 (a homolog of the yeast protein Dop1)	Gillingham, A.K., Whyte, J.R., Panic, B. and Munro, S. (2006). Mon2, a relative of large Arf exchange factors, recruits Dop1 to the Golgi apparatus. J. Biol. Chem. 281, 2273-2280.
Dtna	Lien, C.F., Vlachouli, C., Blake, D.J., Simons, J.P. and Górecki, D.C. (2004). Differential spatio-temporal expression of alpha-dystrobrevin-1 during mouse development. Gene Expr. Patterns. 4, 583-593.
Dync1ic2	Kardon, J.R. and Vale, R.D. (2009). Regulators of the cytoplasmic dynein motor. Nat. Rev. Mol. Cell Biol. 10, 854-865.
Erc2 (a.k.a. Cast1)	Hida, Y. and Ohtsuka, T. (2010). CAST and ELKS proteins: structural and functional determinants of the presynaptic active zone. J. Biochem. 148, 131-137.
	Schoch, S. and Gundelfinger, E.D. (2006). Molecular organization of the presynaptic active zone. Cell Tissue Res. 326, 370-391.
Ergic3	Nishikawa, M., Kira, Y., Yabunaka, Y. and Inoue, M. (2006). Identification and characterization of endoplasmic reticulum-associated protein, ERp43. Gene 386, 42-51.
Fkbp1b	Timerman, A.P., Onoue, H., Xin, H.B., Barg, S., Copello, J., Wiederrecht, G. and Fleischer, S. (1996). Selective binding of FKBP12.6 by the cardiac ryanodine receptor. J. Biol. Chem. 271, 20385-20391.
	Morton-Jones, R.T., Cannell, M.B., Jeyakumar, L.H., Fleischer, S. and Housley, G.D. (2005). Differential expression of ryanodine receptors in the rat cochlea. Neuroscience 137, 275-286.
	Zalk, R, Lehnart, S.E. and Marks, A.R. (2007). Modulation of the ryanodine receptor and intracellular calcium. Annu. Rev. Biochem. 76, 367-385.
Kcnq2	Jin, Z, Liang, G.H., Cooper, E.C. and Jarlebark, L. (2009). Expression and localization of K channels KCNQ2 and KCNQ3 in the mammalian cochlea. Audiol. Neurootol. 14, 98-105.
	Regev, N., Degani-Katzav, N, ., Korngreen, A., Etzioni, A., Siloni, S., Alaimo, A., Chikvashvili, D., Villarroel, A., Attali, B. and Lotan, I. (2009). Selective interaction of syntaxin 1A with KCNQ2: possible implications for specific modulation of presynaptic activity. PLoS One 4, e6586.
Kif1b	Hirokawa, N., Noda, Y., Tanaka, Y. and Niwa, S. (2009). Kinesin superfamily motor proteins and intracellular transport. Nat. Rev. Mol. Cell Biol. 10, 682-696.
Lmo7	Ooshio, T., Irie, K., Morimoto, K., Fukuhara, A., Imai, T. and Takai, Y. (2004). Involvement of LMO7 in the association of two cell-cell adhesion molecules, nectin and E-cadherin, through afadin and alpha-actinin in epithelial cells. J. Biol. Chem. 279, 31365-31373.
	Takai, Y., Ikeda, W., Ogita, H. and Rikitake, Y. (2008). The immunoglobulin-like cell adhesion molecule nectin and its associated protein afadin. Annu. Rev. Cell Dev. Biol. 24, 309-342.
Madd	Yamaguchi, K., Tanaka, M., Mizoguchi, A., Hirata, Y., Ishizaki, H., Kaneko, K., Miyoshi, J. and Takai, Y. (2002). A GDP/GTP exchange protein for the Rab3 small G protein family up-regulates a postdocking step of synaptic exocytosis in central synapses. Proc. Natl. Acad. Sci. U. S. A. 99, 14536-14541.
	Tanaka, M., Miyoshi, J., Ishizaki, H., Togawa, A., Ohnishi, K., Endo, K., Matsubara, K., Mizoguchi, A., Nagano, T., Sato, M. et al. (2001). Role of Rab3 GDP/GTP exchange protein in synaptic vesicle trafficking at the mouse neuromuscular junction. Mol. Biol Cell. 12, 1421-1430.
	Hirokawa, N., Noda, Y., Tanaka, Y. and Niwa, S. (2009). Kinesin superfamily motor proteins and intracellular transport. Nat. Rev. Mol. Cell Biol. 10, 682-696.
Mcf2l (a.k.a Dbs, Ost)	Ieguchi, K., Ueda, S., Kataoka, T. and Satoh, T. (2007). Role of the guanine nucleotide exchange factor Ost in negative regulation of receptor endocytosis by the small GTPase Rac1. J. Biol. Chem. 282, 23296-23305.
Mef2d	Flavell, S.W., Cowan, C.W., Greer, P.L., Lin, Y., Paradis, S., Griffith, E.C., Hu, L.S., Chen, C. and Greenberg, M.E. (2006). Activity-dependent regulation of MEF2 transcription factors suppresses excitatory synapse number. Science 311, 1008-1012.
	Flavell, S.W., Kim, T.K., Gray, J.M., Harmin, D.A., Hemberg, M., Hong, E.J., Markenscoff-Papadimitriou, E., Bear, D.M. and Greenberg, M.E. (2008). Genome-wide analysis of MEF2 transcriptional program reveals synaptic target genes and neuronal activity-dependent polyadenylation site selection. Neuron 60, 1022-1038.
Mpp7	Bohl, J., Brimer, N., Lyons, C. and Vande Pol, S.B. (2007). The stardust family protein MPP7 forms a tripartite complex with LIN7 and DLG1 that regulates the stability and localization of DLG1 to cell junctions. J. Biol. Chem. 282, 9392-9400.
Nrcam	Grumet, M. (1997). Nr-CAM: a cell adhesion molecule with ligand and receptor functions. Cell Tissue Res. 290, 423-428.
	Davis, J.Q. and Bennett, V. (1994). Ankyrin binding activity shared by the neurofascin/L1/NrCAM family of nervous system cell adhesion molecules. J. Biol. Chem. 269, 27163-27166.
Nrxn3	Lisé, M.F. and El-Husseini, A. (2006). The neuroligin and neurexin families: from structure to function at the synapse. Cell Mol. Life Sci. 63, 1833-1849.
	Craig, A.M. and Kang, Y. (2007). Neurexin-neuroligin signaling in synapse development. Curr. Opin. Neurobiol. 17, 43-52.
Phf21a/Bhc80	Klajn, A., Ferrai, C., Stucchi, L., Prada, I., Podini, P., Baba, T., Rocchi, M., Meldolesi, J. and D'Alessandro, R. (2009). The rest repression of the neurosecretory phenotype is negatively modulated by BHC80, a protein of the BRAF/HDAC complex. J. Neurosci. 29, 6296-6307.
	Iwase, S., Januma, A., Miyamoto, K., Shono, N., Honda, A., Yanagisawa, J. and Baba, T. (2004). Characterization of BHC80 in BRAF-HDAC complex, involved in neuron-specific gene repression. Biochem. Biophys. Res. Commun. 322, 601-608.
Ppp3cb (a.k.a. calcineurin A beta)	Lopez, E., Rosado, J.A. and Redondo, P.C. (2011). Immunophilins and thrombotic disorders. Curr. Med. Chem. 18, 5414-5423.
	Bultynck, G., Vermassen, E., Szlufcik, K., De Smet, P., Fissore, R.A., Callewaert, G., Missiaen, L., De Smedt, H. and Parys, J.B. (2003). Calcineurin and intracellular Ca2+-release channels: regulation or association? Biochem. Biophys. Res. Commun. 311, 1181-1193.
Ptpru	Serra-Pagès, C., Medley, Q.G., Tang, M., Hart, A. and Streuli, M. (1998). Liprins, a family of LAR transmembrane protein-tyrosine phosphatase-interacting proteins. J. Biol. Chem. 273, 15611-15620.
	Ko, J., Na, M., Kim, S., Lee, J.R. and Kim, E. (2003). Interaction of the ERC family of RIM-binding proteins with the liprin-alpha family of multidomain proteins. J. Biol. Chem. 278, 42377-42385.
Rapgef6 (a.k.a. PDZgef2)	Kuiperij, H.B., de Rooij, J., Rehmann, H., van Triest, M., Wittinghofer, A., Bos, J.L. and Zwartkruis, F.J. (2003). Characterisation of PDZ-GEFs, a family of guanine nucleotide exchange factors specific for Rap1 and Rap2. Biochim. Biophys. Acta. 1593, 141-149.
	Pannekoek, W.J., Kooistra, M.R., Zwartkruis, F.J. and Bos, J.L. (2009). Cell-cell junction formation: the role of Rap1 and Rap1 guanine nucleotide exchange factors. Biochim. Biophys. Acta. 1788, 790-796.
	Severson, E.A., Lee, W.Y., Capaldo, C.T., Nusrat, A. and Parkos, C.A. (2009). Junctional adhesion molecule A interacts with Afadin and PDZ-GEF2 to activate Rap1A, regulate beta1 integrin levels, and enhance cell migration. Mol. Biol. Cell 20, 1916-1925.
	Boettner, B., Govek, E.E., Cross, J. and Van Aelst, L. (2000). The junctional multidomain protein AF-6 is a binding partner of the Rap1A GTPase and associates with the actin cytoskeletal regulator profilin. Proc. Natl. Acad. Sci. U. S. A. 97, 9064-9069.
Rest (a.k.a. Nrsf)	Ooi, L. and Wood, I.C. (2007). Chromatin crosstalk in development and disease: lessons from REST. Nat. Rev. Genet. 8, 544-554.
Rims2	Schoch, S. and Gundelfinger, E.D. (2006). Molecular organization of the presynaptic active zone. Cell Tissue Res. 326, 370-391.
	Olsen, O., Moore, K.A., Nicoll, R.A. and Bredt, D.S. (2006). Synaptic transmission regulated by a presynaptic MALS/Liprin-alpha protein complex. Curr. Opin. Cell Biol. 18, 223-227.
Sgip1	Uezu, A., Horiuchi, A., Kanda, K., Kikuchi, N., Umeda, K., Tsujita, K., Suetsugu, S., Araki, N., Yamamoto, H., Takenawa, T. et al. (2007). SGIP1alpha is an endocytic protein that directly interacts with phospholipids and Eps15. J. Biol. Chem. 282, 26481-26489.
Sh3glb1	Cheung, Z.H. and Ip, N.Y. (2009). Endophilin B1: Guarding the gate to destruction. Commun. Integr. Biol. 2, 130-132.
	Lee, S.Y., Wenk, M.R., Kim, Y., Nairn, A.C. and De Camilli, P. (2004). Regulation of synaptojanin 1 by cyclin-dependent kinase 5 at synapses. Proc. Natl. Acad. Sci. U. S. A. 101, 546-551.
Snap91	Morgan, J.R., Prasad, K., Jin, S., Augustine, G.J. and Lafer, E.M. (2003). Eps15 homology domain-NPF motif interactions regulate clathrin coat assembly during synaptic vesicle recycling. J. Biol. Chem. 278, 33583-33592.
	Wu, F., Mattson, M.P. and Yao, P.J. (2010). Neuronal activity and the expression of clathrin-assembly protein AP180. Biochem. Biophys. Res. Commun. 402, 297-300.
	Yao, P.J., Petralia, R.S., Bushlin, I., Wang, Y. and Furukawa, K. (2005). Synaptic distribution of the endocytic accessory proteins AP180 and CALM. J. Comp. Neurol. 481, 58-69.
Snx14	Worby, C.A. and Dixon, J.E. (2002). Sorting out the cellular functions of sorting nexins. Nat. Rev. Mol. Cell Biol. 3, 919-931.
Synj1	Haffner, C., Takei, K., Chen, H., Ringstad, N., Hudson, A., Butler, M.H., Salcini, A.E., Di Fiore, P.P. and De Camilli, P. (1997). Synaptojanin 1: localization on coated endocytic intermediates in nerve terminals and interaction of its 170 kDa isoform with Eps15. FEBS Lett. 419, 175-180.
	Slepnev, V.I. and De Camilli, P. (2000). Accessory factors in clathrin-dependent synaptic vesicle endocytosis. Nat. Rev. Neurosci. 1, 161-172.
	Song, W. and Zinsmaier, K.E. (2003). Endophilin and synaptojanin hook up to promote synaptic vesicle endocytosis. Neuron 40, 665-667.
Vps13c	Velayos-Baeza, A., Levecque, C., Dobson-Stone, C. and Monaco, A.P. (2008). The Function of Chorein. Neuroacanthocytosis Syndromes II., .
	Velayos-Baeza, A., Vettori, A., Copley, R.R., Dobson-Stone, C. and Monaco, A.P. (2004). Analysis of the human VPS13 gene family. Genomics 84, 536-549.
Wdr35	Gilissen, C., Arts, H.H., Hoischen, A., Spruijt, L., Mans, D.A., Arts, P., van Lier, B., Steehouwer, M., van Reeuwijk, J., Kant, S.G. et al. (2010). Exome sequencing identifies WDR35 variants involved in Sensenbrenner syndrome. Am. J. Hum. Genet. 87, 418-423.
